# Supplementary material
Source: Springer Nature journal article supplement (https://www.springermedizin.de/resource/supplementary/12877_2013_986_MOESM1_ESM.pdf/9440846)
Supplement: MOESM1 [file 9440846]

# Recruitment Algorithm

Admitted from RACF, inpatient on weekdays, n=457 patients (574 episodes)

Excluded n=334

Primary dx does not fit (n=83)

Age < 65 (n=8)

Outside Catchment (n=31)

Interim Care (n=12)

Palliative/died in hospital (n=56)

Consent not obtained (n=139)

Behavioural issues (n=5)

Randomized (n=123)

Intervention (n=61)  
Dropped out (n=1),  
Too young (n=3)

Control (n=62)  
Moved out of area (n=1),  
Too young (n=1),  
Data lost (n=1)

n=57

22

22

n=59

Died before 6/12 visit

35

Survived to 6 month visit

37
